# Supplementary material
Source: ML conference proceedings conference paper supplement (https://openaccess.thecvf.com/content/ICCV2025/html/Chen_Knowledge_Distillation_for_ICCV_2025_paper.html)
Supplement: Supplementary file 1 [file Chen_Knowledge_Distillation_for_ICCV_2025_supplemental.pdf]

# Knowledge Distillation for Learned Image Compression

Yunuo Chen<sup>1\*</sup> Zezheng Lyu<sup>2\*</sup> Bing He<sup>1</sup> Ning Cao<sup>3</sup> Gang Chen<sup>3</sup> Guo Lu<sup>1</sup>  Wenjun Zhang<sup>1</sup>

<sup>1</sup> Shanghai Jiao Tong University <sup>2</sup> Massachusetts Institute of Technology

<sup>3</sup> E-surfing Vision Technology Co., Ltd.

## 1. More Detailed Derivation

### Theorem 1 (KL Divergence Comparison between models)

For the teacher model and the student model within the LIC framework described above, let  $M_1$  denote the stage-wise method,  $M_2$  denote the joint training method,  $J_i$  denote the absolute determinant value of the Jacobian Matrix of each block,  $P_T(\mathbf{y}) = P(\mathbf{y}^T | \Theta_a)$ , and  $P_S(\mathbf{y}) = P(\mathbf{y}^S | \Psi_a)$ . Assume the following:

1. Each block is differentiable and invertible.
2. Regardless of how the student model is trained, each  $J_i^{-1}$  follows an invariant distribution with fixed mean and variance, and is an unbiased estimator of the target teacher model's block.
3.  $\mathbb{E}_{M_2} [\prod_{i=1}^3 (J_i^{-1})^2] \geq \prod_{i=1}^3 \mathbb{E}_{M_1} (J_i^{-1})^2$ .
4.  $\mathbb{E}_{M_2} [\prod_{i=1}^3 J_i^{-1}] \leq \prod_{i=1}^3 \mathbb{E}_{M_1} J_i^{-1}$ .

We can interpret Assumptions 3 and 4 as, in joint training, dependencies increase each block's co-movement in magnitudes but do not increase the absolute mean of each block's product.

Then, we state that:

$$D_{KL}(P_T(\mathbf{y}) \| P_S(\mathbf{y}))_{M_1} < D_{KL}(P_T(\mathbf{y}) \| P_S(\mathbf{y}))_{M_2}.$$

**Proof** First, we have:

$$J_T^{-1} := (J_1^T J_2^T J_3^T)^{-1}, \quad J_S^{-1} := (J_1^S J_2^S J_3^S)^{-1}.$$

Thus:

$$P_T(\mathbf{y}) = P(\mathbf{x}) \cdot J_T^{-1}, \quad P_S(\mathbf{y}) = P(\mathbf{x}) \cdot J_S^{-1}.$$

The KL divergence between the teacher and student latent distributions is defined as:

$$\begin{aligned} D_{KL}(P_T \| P_S) &= \mathbb{E}_{P_T} \left[ \log \frac{P_T(\mathbf{y})}{P_S(\mathbf{y})} \right] \\ &= \mathbb{E}_{P_T} \left[ \log \frac{P(\mathbf{x}) \cdot J_T^{-1}}{P(\mathbf{x}) \cdot J_S^{-1}} \right] \\ &= \mathbb{E}_{P_T} \left[ \log \frac{J_T^{-1}}{J_S^{-1}} \right] \\ &= -\mathbb{E}_{P_T} [\log J_S^{-1}] + \log J_T^{-1}, \end{aligned}$$

We perform a second-order Taylor expansion of  $\log(J_S^{-1})$  around the deterministic Jacobian  $J_T^{-1}$ :

$$\begin{aligned} \log(J_S^{-1}) &\approx \log(J_T^{-1}) + \frac{1}{J_T^{-1}} (J_S^{-1} - J_T^{-1}) - \\ &\quad \frac{1}{2(J_T^{-1})^2} (J_S^{-1} - J_T^{-1})^2. \end{aligned}$$

Taking expectations under  $P_T$ :

$$\begin{aligned} \mathbb{E}_{P_T} [\log(J_S^{-1})] &\approx \log(J_T^{-1}) + \frac{1}{J_T^{-1}} \mathbb{E}_{P_T} [J_S^{-1} - J_T^{-1}] \\ &\quad - \frac{1}{2(J_T^{-1})^2} \mathbb{E}_{P_T} [(J_S^{-1} - J_T^{-1})^2]. \end{aligned}$$

Since we assume that on average the student training is unbiased around the teacher distribution, we have:

$$\mathbb{E}_{P_T} [J_S^{-1} - J_T^{-1}] = 0.$$

Thus, the expectation simplifies clearly to:

$$\mathbb{E}_{P_T} [\log(J_S^{-1})] \approx \log(J_T^{-1}) - \frac{1}{2(J_T^{-1})^2} \text{Var}(J_S^{-1}).$$

Substitute back into the original KL expression:

$$\begin{aligned} D_{KL}(P_T \| P_S) &= -\mathbb{E}_{P_T} [\log(J_S^{-1})] + \log(J_T^{-1}) \\ &\approx -\left( \log(J_T^{-1}) - \frac{1}{2(J_T^{-1})^2} \text{Var}(J_S^{-1}) \right) + \log(J_T^{-1}). \end{aligned}$$

The  $\log(J_T^{-1})$  terms cancel neatly, giving explicitly:

$$D_{KL}(P_T \| P_S) \approx \frac{\text{Var}(J_S^{-1})}{2(J_T^{-1})^2}.$$

Thus:

$$\begin{aligned} \frac{D_{KL}(P_T \| P_S)_{M_2}}{D_{KL}(P_T \| P_S)_{M_1}} &= \frac{\text{Var}(J_S^{-1})_{M_2}}{\text{Var}(J_S^{-1})_{M_1}} \\ &\geq 1 \quad (\text{Assumption 3 and 4}), \end{aligned} \tag{1}$$

which completes the proof.

\* Equal Contribution  Corresponding Author

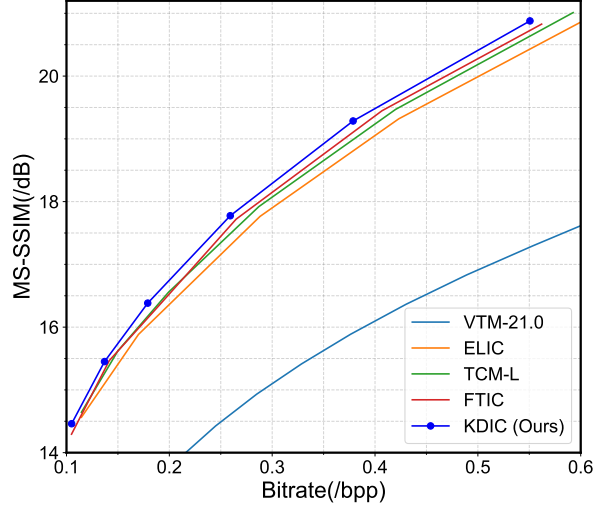

Figure 1. RD curves of MS-SSIM on CLIC dataset.

## 2. RD-Curve of MS-SSIM

As shown in Fig. 1, we provide more RD curves about MS-SSIM on the CLIC dataset. We compare our KDIC model with VTM-21.0 [1], FTIC [2] and TCM [3].

## 3. Settings of VTM-21.0

We utilize VTM-21.0 [1] and demonstrate sample bash commands for encoding and decoding a YUV format image with VTM-21.0.

```
VTM-21.0/bin/EncoderAppStatic -i tmp.
yuv -c VTM-21.0/cfg/
encoder_intra_vtm.cfg -q 61 -o /dev/
null -b tmp.bin -wdt 768 -hgt 512 -
fr 1 -f 1 --InputChromaFormat=444 --
InputBitDepth=8 --
ConformanceWindowMode=1
```

```
VTM-21.0/bin/DecoderAppStatic -b tmp.
bin -o tmp.yuv -d 8
```

## References

- [1] A. Browne, Y. Ye, and S. Kim. Algorithm description for versatile video coding and test model 21 (vtm 21), document jvet-af2002. In Joint Video Experts Team (JVET) of ITU-T SG 16 WP 3 and ISO/IEC JTC 1/SC 29/WG 11, 32nd Meeting, Hannover. 2
- [2] Han Li, Shaohui Li, Wenrui Dai, Chenglin Li, Junni Zou, and Hongkai Xiong. Frequency-aware transformer for learned image compression. In *The Twelfth International Conference on Learning Representations*, 2024. 2
- [3] Jinming Liu, Heming Sun, and Jiro Katto. Learned image compression with mixed transformer-cnn architectures. In *Proceedings of the IEEE/CVF conference on computer vision and pattern recognition*, pages 14388–14397, 2023. 2
